# Supplementary material for: Distinguishing and unraveling classical and non-classical pathways in MFI zeolite crystallization: insights into their contributions and impact on the final product
Source: Royal Society of Chemistry journal article supplement (doi:10.1039/d5qi00224a), 2025-01-01
Supplement: d5qi00224a1.pdf [file d5qi00224a1.pdf]

## **Electronic Supplementary Information (ESI)**

**For**

### **Distinguishing and unraveling classical and non-classical pathways in MFI zeolite crystallization: Insights into their contributions and impact on the final product**

Jiayu Yu,<sup>a</sup> Ke Du,<sup>a</sup> Di Pan,<sup>a</sup> He Li,<sup>b</sup> Ling Ding,<sup>a</sup> Wei Chen,<sup>a</sup> Yahong Zhang<sup>\*a</sup> and Yi Tang<sup>a</sup>

<sup>a</sup>. Department of Chemistry, Shanghai Key Laboratory of Molecular Catalysis and Innovative Materials, State Key Laboratory of Porous Material for Separation and Conversion, Collaborative Innovation Centre of Chemistry for Energy Materials (iChEM), Fudan University, Shanghai 200433, P. R. China.

<sup>b</sup>. SINOPEC (Dalian) Research Institute of Petroleum and Petrochemicals Co., Ltd., Dalian 116045, Liaoning, China.

E-mail: zhangyh@fudan.edu.cn.

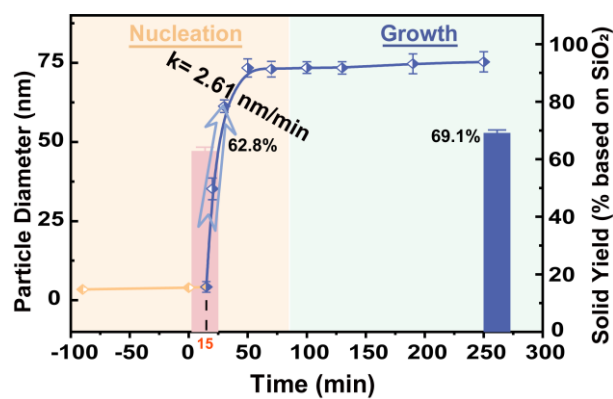

**Figure S1.** Sizes and solid yields of silicalite-1 zeolite particles synthesized with ethanol/SiO<sub>2</sub> ratios of 0 and H<sub>2</sub>O/SiO<sub>2</sub> of 10.16 under different hydrothermal treatment times. The curves represent particle diameters, while the bar charts show the solid yields obtained by dialysis (pink) or centrifugation (blue) after removing the structure directing agent via calcination at 550 °C. Error bars indicate standard deviation (SD) and data for size are presented as the mean  $\pm$  SD (n = 6) and for yield are presented as the mean  $\pm$  SD (n = 4)

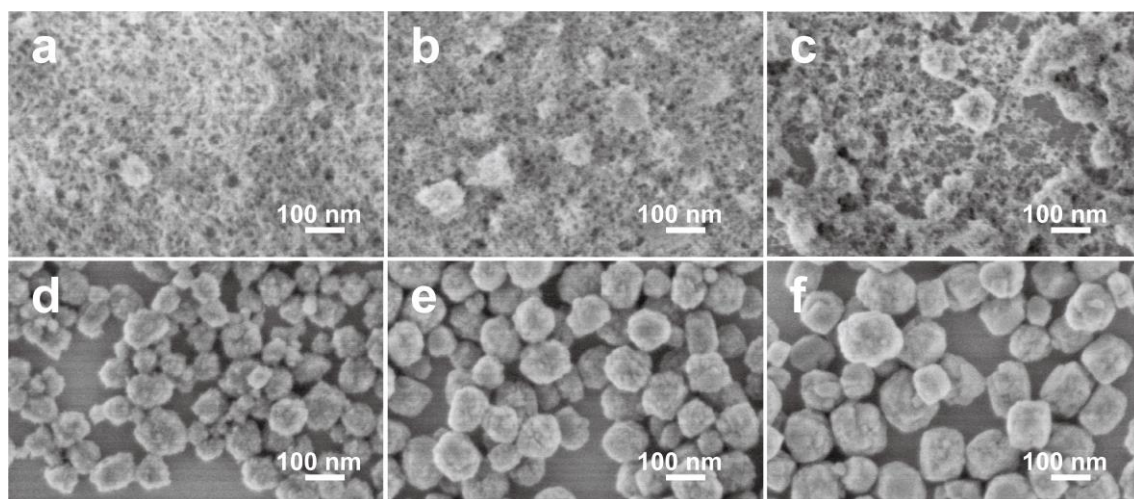

**Figure S2.** SEM images of silicalite-1 samples obtained by dialysis at the different crystallization time. (a) 135 min; (b) 165 min; (c) 185 min; (d) 215 min (e) 245 min; (f) 305 min.

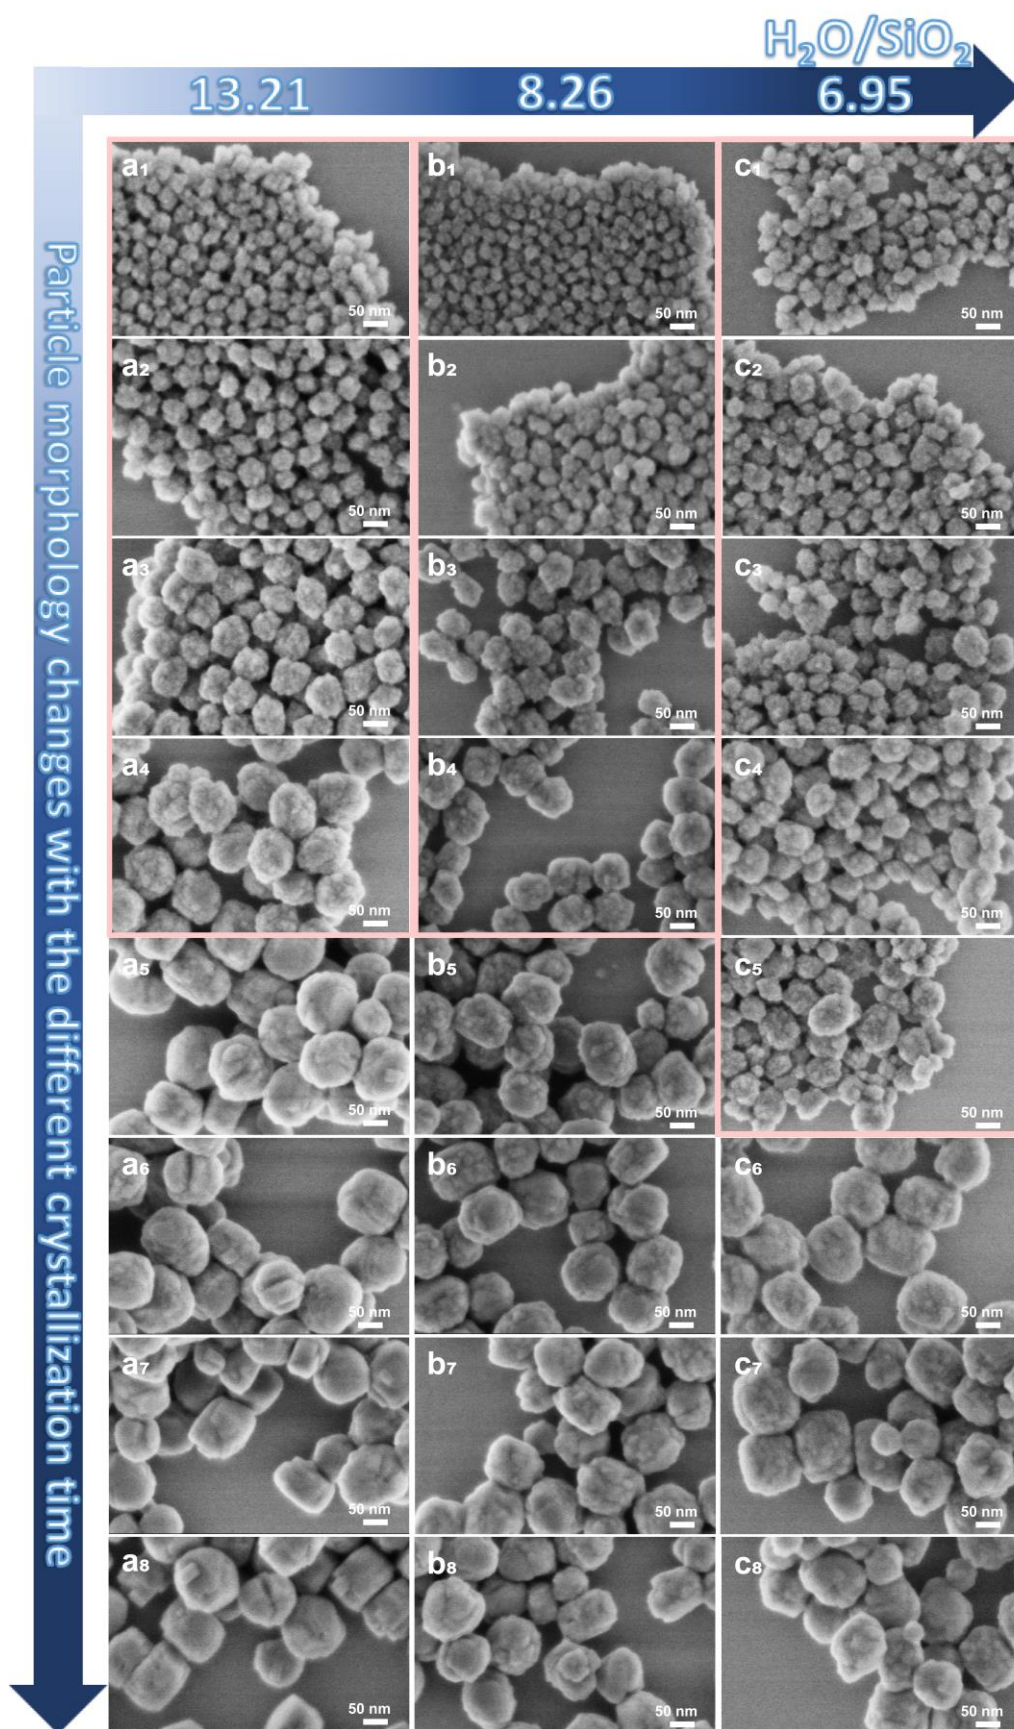

**Figure S3.** The SEM images of silicalite-1 obtained by centrifugation under different  $H_2O/SiO_2$  molar ratios at the stage of growth with different crystallization time. (a<sub>1</sub>-a<sub>8</sub>) 13.21; (b<sub>1</sub>-b<sub>8</sub>) 8.26; (c<sub>1</sub>-c<sub>8</sub>) 6.95. The pink lines represent the growth occurred during the linear growth stage.

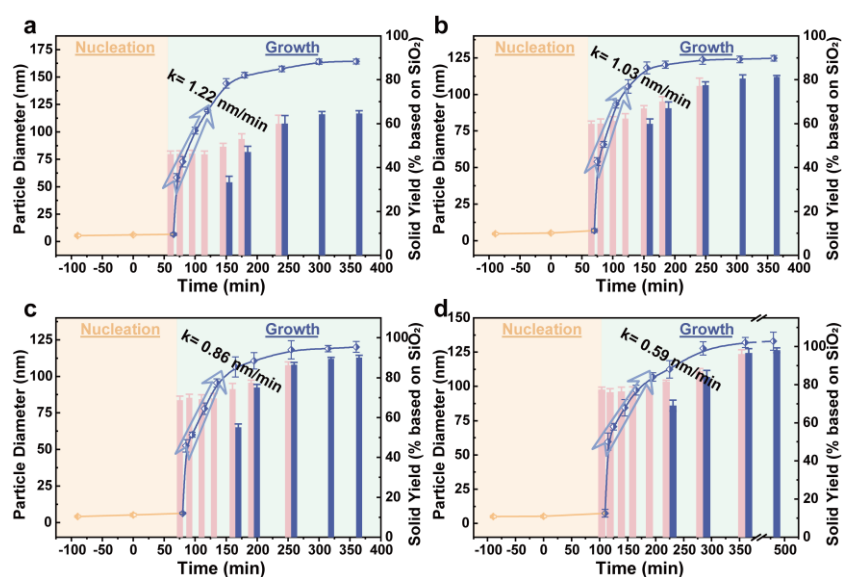

**Figure S4.** Sizes and solid yields of ZSM-5 zeolite particles synthesized with different  $H_2O/SiO_2$  molar ratios under different hydrothermal treatment times: (a) 13.21; (b) 10.16; (c) 8.26; (d) 6.95. The curves represent particle diameters, while the bar charts show the solid yields obtained by dialysis (pink) or centrifugation (blue) after removing the structure directing agent via calcination at 550 °C. Error bars indicate standard deviation (SD) and data for size are presented as the mean  $\pm$  SD ( $n = 6$ ) and for yield are presented as the mean  $\pm$  SD ( $n = 4$ ).

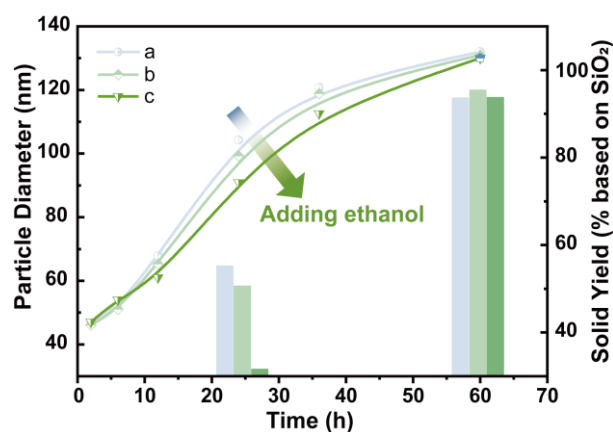

**Figure S5.** The growth curves and solid yield of the dialysis solution with different ethanol/SiO<sub>2</sub> molar ratios or H<sub>2</sub>O/SiO<sub>2</sub> molar ratios at 80 °C. (a) ethanol/SiO<sub>2</sub> = 0; (b) ethanol/SiO<sub>2</sub> = 4; (c) ethanol/SiO<sub>2</sub> = 10. The curves represent particle diameters, while the bar charts show the solid yields obtained by centrifugation after removing the structure directing agent via calcination at 550 °C.



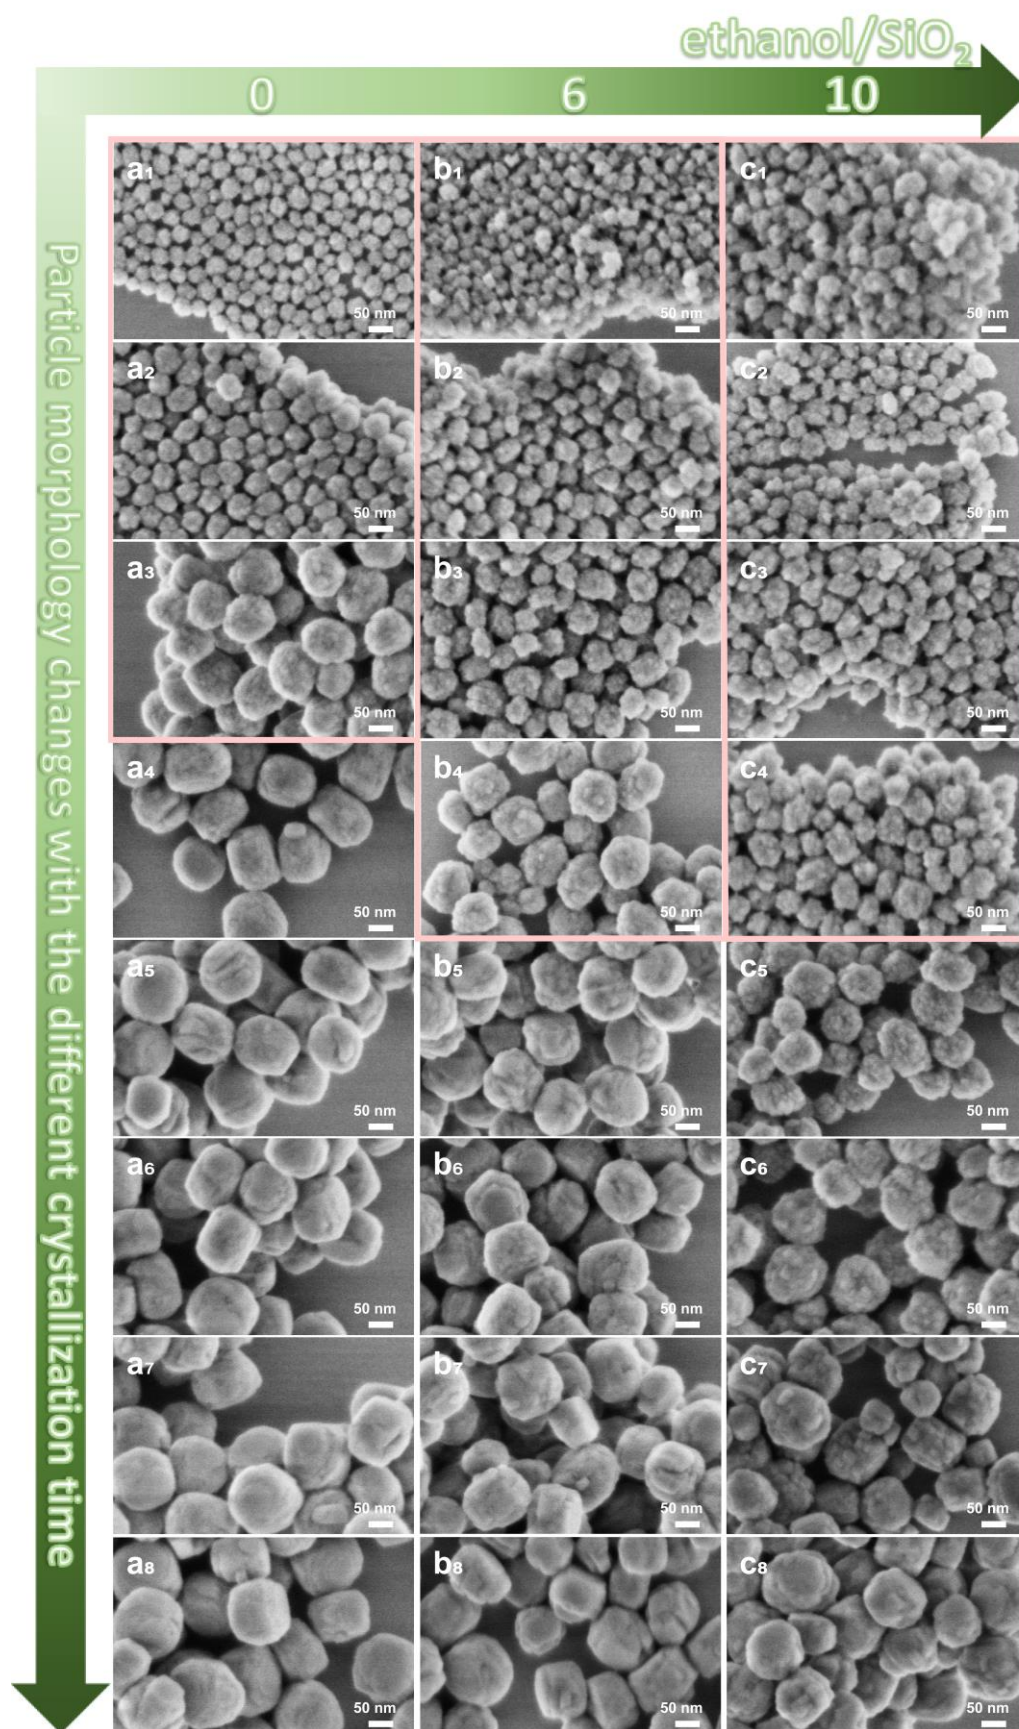

**Figure S6.** The SEM images of silicalite-1 obtained by centrifugation under different ethanol/SiO<sub>2</sub> molar ratios at the stage of growth with different crystallization time. (a<sub>1</sub>-a<sub>8</sub>) 0; (b<sub>1</sub>-b<sub>8</sub>) 6; (c<sub>1</sub>-c<sub>8</sub>) 10. The pink lines represent the growth occurred during the linear growth stage.

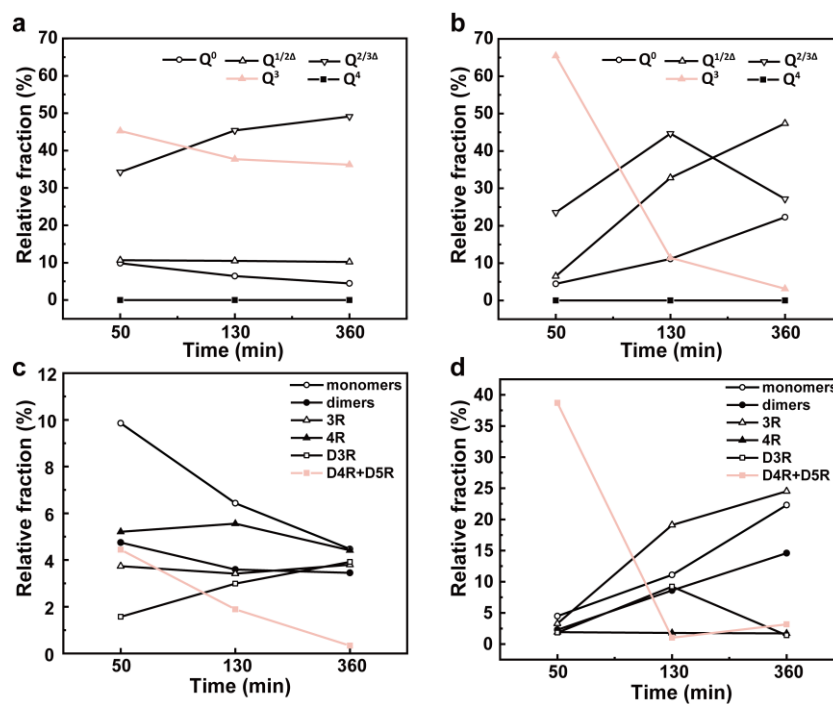

**Figure S7.** Distribution of Q<sup>n</sup> in (a, b) all oligomers and (c, d) some representative selected oligomers (monomer, dimer, cyclic trimer (3R), cyclic tetramer (4R), prismatic hexamer (D3R), cubic octamer (D4R) and double-five-ring (D5R)) in the supernatants obtained by centrifugation at different time before (a, c) and after (b, d) the addition of ethanol determined with liquid-state <sup>29</sup>Si NMR spectroscopy. Q<sup>nΔ</sup> means Si site with n connectivity present in a 3-membered ring.



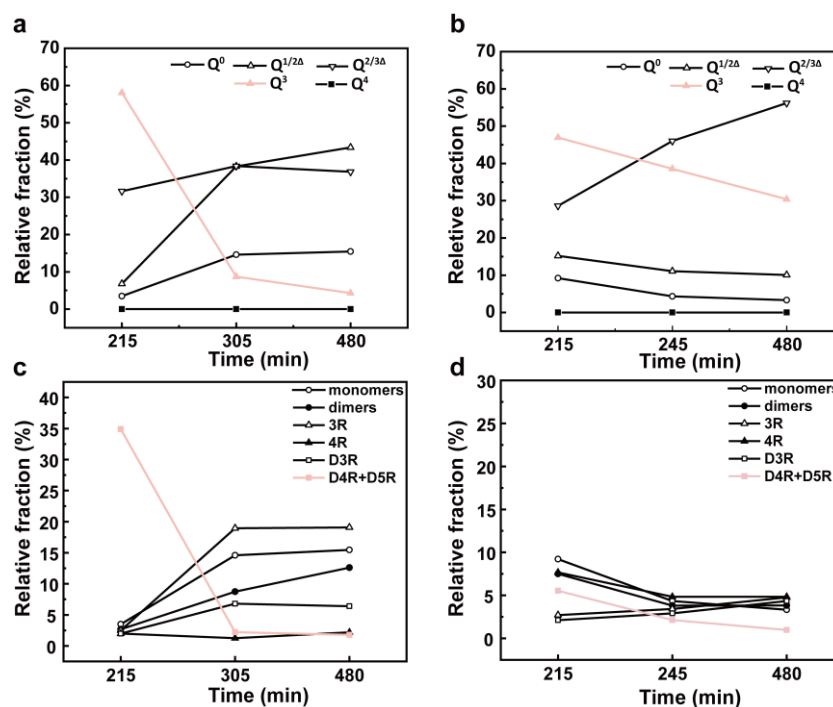

**Figure S8.** Distribution of  $Q^n$  in (a, b) all oligomers and (c, d) some representative selected oligomers (monomer, dimer, cyclic trimer (3R), cyclic tetramer (4R), prismatic hexamer (D3R), cubic octamer (D4R) and double-five-ring (D5R)) in the supernatants obtained by centrifugation at different time before (a, c) and after (b, d) the removal of ethanol determined with liquid-state  $^{29}\text{Si}$  NMR spectroscopy.  $Q^{n\Delta}$  means Si site with  $n$  connectivity present in a 3-membered ring.

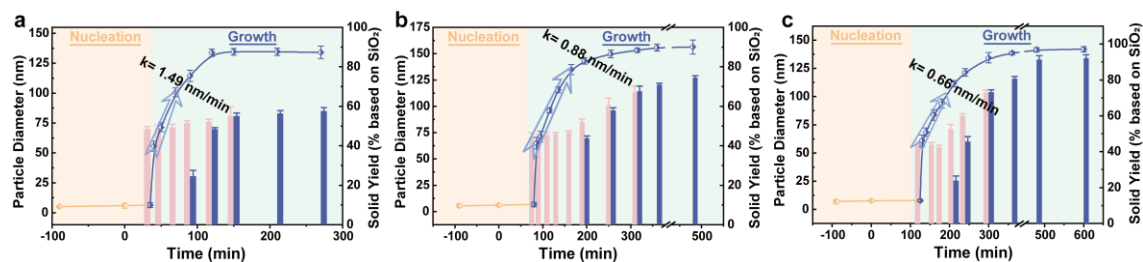

**Figure S9.** Sizes and solid yields of ZSM-5 zeolite particles synthesized with different ethanol/SiO<sub>2</sub> molar ratios under different hydrothermal treatment times: (a) 0; (b) 6; (c) 10. The curves represent particle diameters, while the bar charts show the solid yields obtained by dialysis (pink) or centrifugation (blue) after removing the structure directing agent via calcination at 550 °C. Error bars indicate standard deviation (SD) and data for size are presented as the mean  $\pm$  SD ( $n = 6$ ) and for yield are presented as the mean  $\pm$  SD ( $n = 4$ )

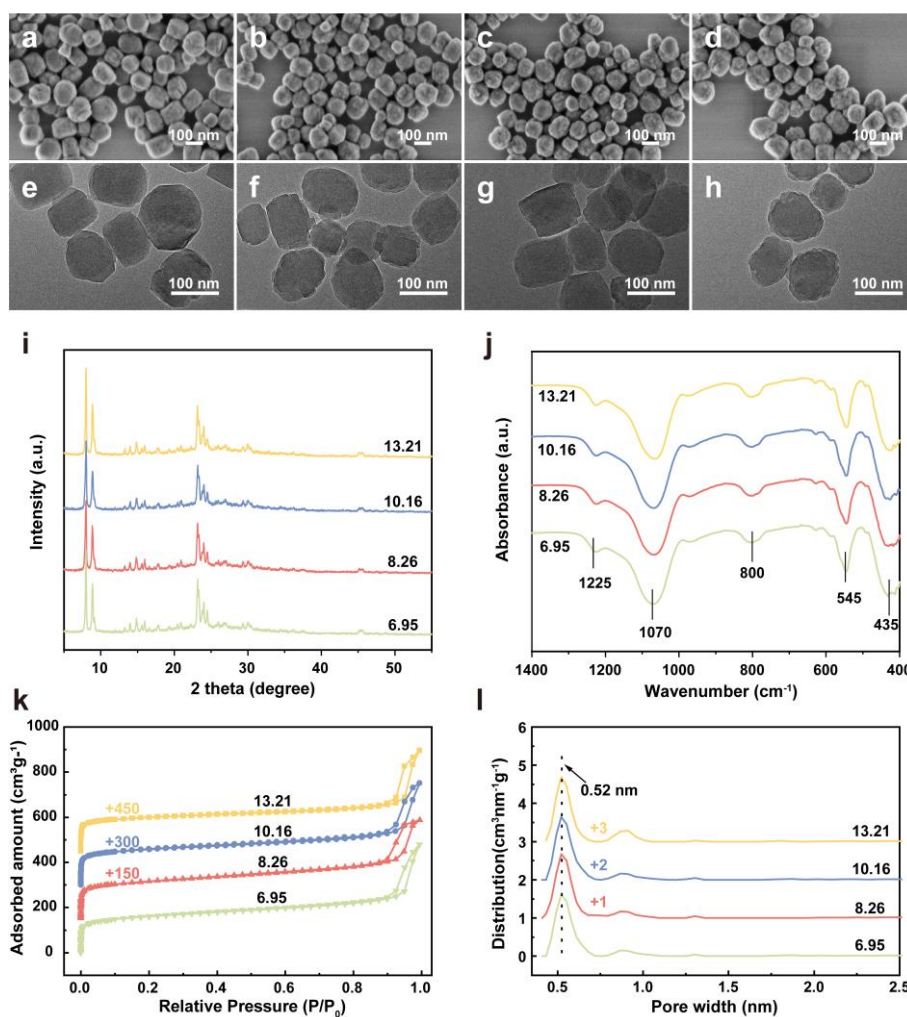

**Figure S10.** (a-d) SEM images of final silicalite-1 obtained at different  $\text{H}_2\text{O}/\text{SiO}_2$  ratios: (a) 13.21, (b) 10.16, (c) 8.26 and (d) 6.95. (e-h) corresponding TEM images. (i) XRD patterns and (j) FTIR patterns of final silicalite-1 obtained at different  $\text{H}_2\text{O}/\text{SiO}_2$  ratios. (k) Ar adsorption-desorption isotherms at 87 K and (l) pore size distribution of the final silicalite-1.

FTIR spectra show that the peaks at  $1225\text{ cm}^{-1}$ ,  $1070\text{ cm}^{-1}$ ,  $800\text{ cm}^{-1}$ ,  $545\text{ cm}^{-1}$ ,  $435\text{ cm}^{-1}$  (Figure S10j) appearing in all samples, correspond to MFI framework characteristic peaks, which indicate definite MFI framework, consistent with the results of their XRD patterns (Figure S10i).

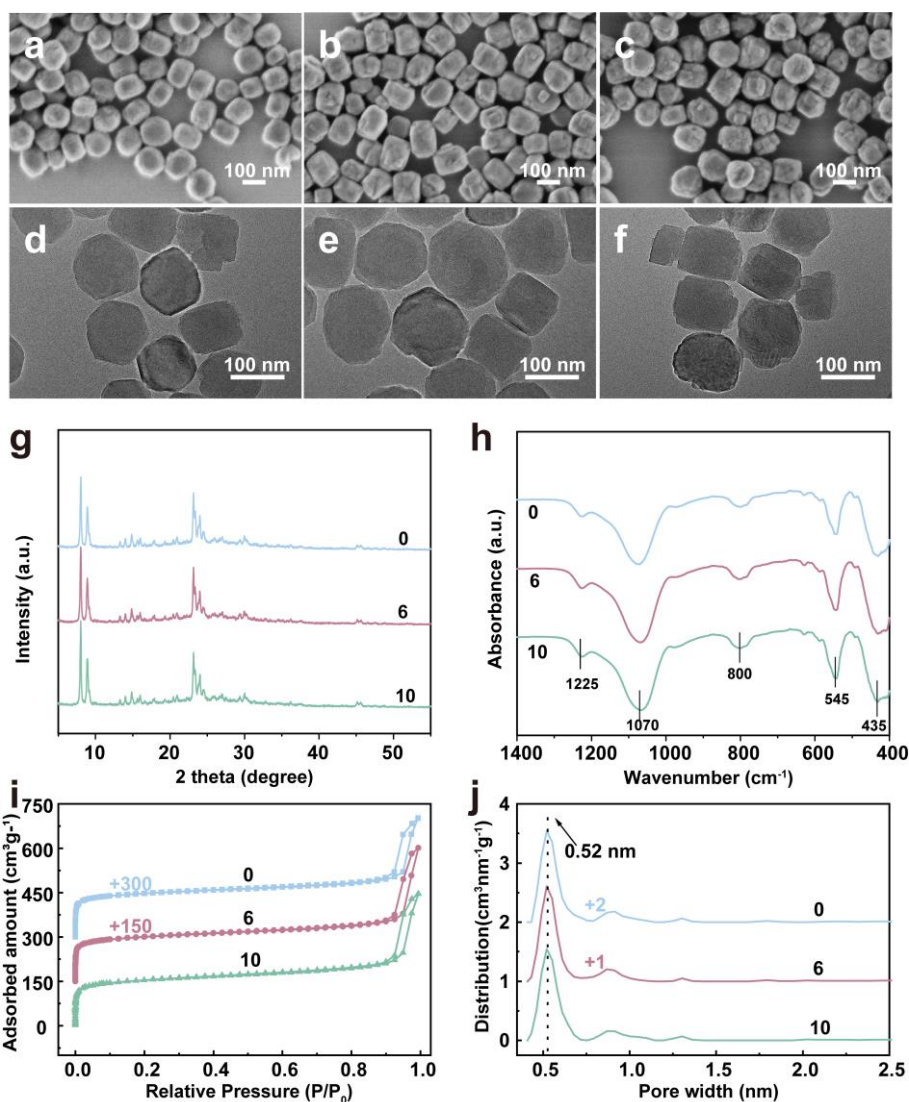

**Figure S11.** (a-c) SEM images of final silicalite-1 obtained at different ethanol/SiO<sub>2</sub> ratios: (a) 0, (b) 6 and (c) 10. (d-f) corresponding TEM images. (g) XRD patterns and (h) FTIR patterns of final silicalite-1 obtained at different ethanol/SiO<sub>2</sub> ratios. (i) Ar adsorption-desorption isotherms at 87 K and (j) pore size distribution of the final silicalite-1.

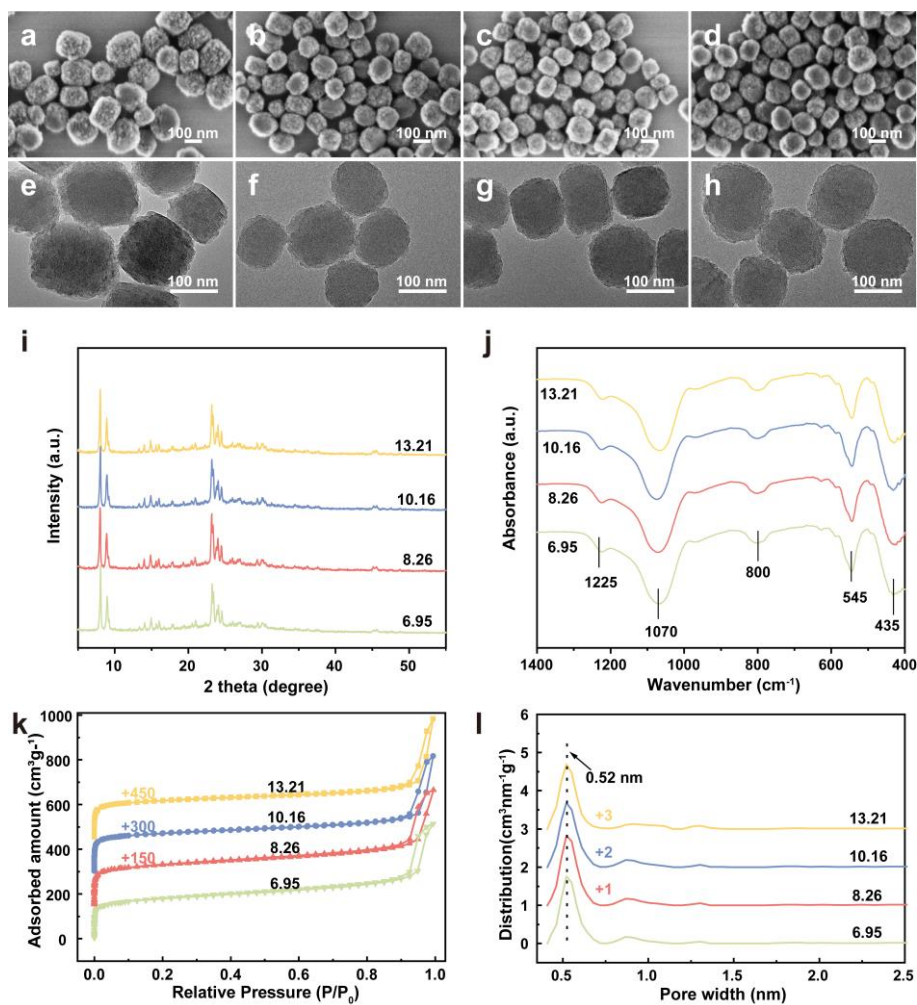

**Figure S12.** (a-d) SEM images of final ZSM-5 obtained at different  $\text{H}_2\text{O}/\text{SiO}_2$  ratios: (a) 13.21, (b) 10.16, (c) 8.26 and (d) 6.95. (e-h) corresponding TEM images. (i) XRD patterns and (j) FTIR patterns of final ZSM-5 obtained at different  $\text{H}_2\text{O}/\text{SiO}_2$  ratios. (k) Ar adsorption-desorption isotherms at 87 K and (l) pore size distribution of the final ZSM-5.

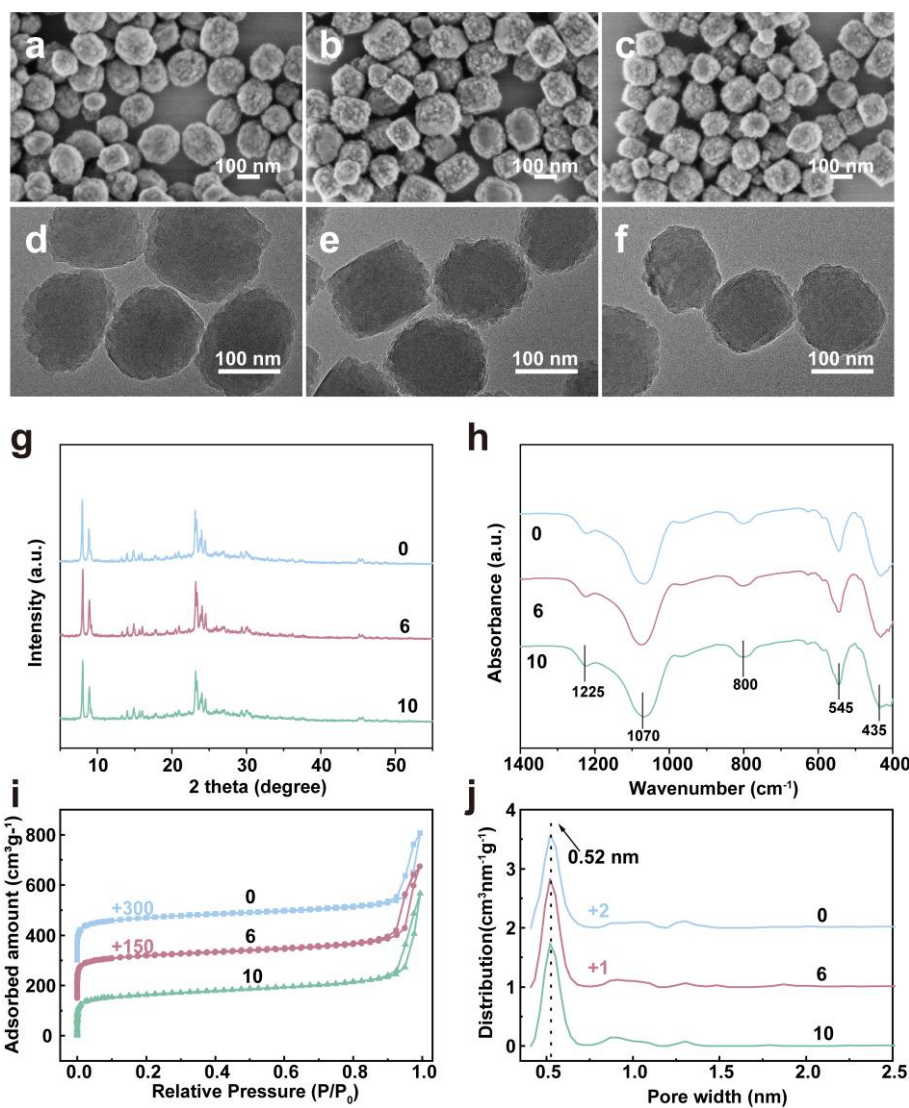

**Figure S13.** (a-c) SEM images of final ZSM-5 obtained at different ethanol/SiO<sub>2</sub> ratios: (a) 0, (b) 6 and (c) 10. (d-f) corresponding TEM images. (g) XRD patterns and (h) FTIR patterns of final ZSM-5 obtained at different ethanol/SiO<sub>2</sub> ratios. (i) Ar adsorption-desorption isotherms at 87 K and (j) pore size distribution of the final ZSM-5.



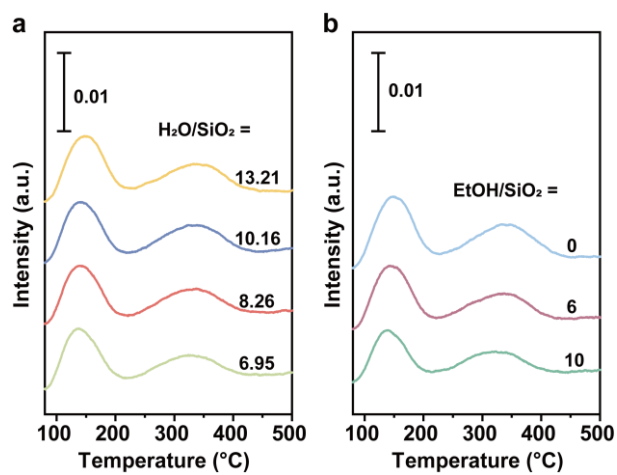

**Figure S14.**  $\text{NH}_3$ -TPD profiles of ZSM-5 samples prepared under different  $\text{H}_2\text{O}/\text{SiO}_2$  (a) and ethanol/ $\text{SiO}_2$  (b) ratios.

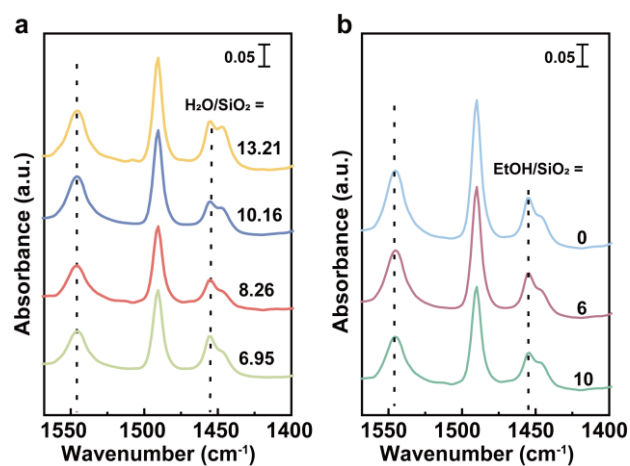

**Figure S15.** Py-IR spectra at 300 °C of ZSM-5 samples prepared under different  $\text{H}_2\text{O}/\text{SiO}_2$  (a) and ethanol/ $\text{SiO}_2$  (b) ratios.

**Table S1.** silicon and aluminum contents (mg/L) and Si/Al ratios in the supernatant of the final products <sup>[a]</sup>

| Sample | H <sub>2</sub> O/SiO <sub>2</sub> | Si                   | Al   | Si/Al ratio |
|--------|-----------------------------------|----------------------|------|-------------|
| 1      | 13.21                             | 2.22×10 <sup>4</sup> | -    | ∞           |
| 2      | 10.16                             | 1.42×10 <sup>4</sup> | 1.42 | 9643        |
| 3      | 8.26                              | 1.13×10 <sup>4</sup> | 2.79 | 3906        |
| 4      | 6.95                              | 7.78×10 <sup>3</sup> | 2.46 | 3050        |

[a] Determined by ICP and then converted by isobaric columns.

**Table S2.** The textural properties of silicalite-1 obtained at different Initial gel compositions

| Entry | Initial gel composition           |                       | Surface Area (m <sup>2</sup> g <sup>-1</sup> ) |                                   |                                   | Pore Volume (cm <sup>3</sup> g <sup>-1</sup> ) |                                   |
|-------|-----------------------------------|-----------------------|------------------------------------------------|-----------------------------------|-----------------------------------|------------------------------------------------|-----------------------------------|
|       | H <sub>2</sub> O/SiO <sub>2</sub> | EtOH/SiO <sub>2</sub> | S <sub>BET</sub> <sup>[a]</sup>                | S <sub>micro</sub> <sup>[b]</sup> | S <sub>extra</sub> <sup>[b]</sup> | V <sub>total</sub> <sup>[c]</sup>              | V <sub>micro</sub> <sup>[b]</sup> |
| 1     | 13.21                             | 4                     | 496                                            | 407                               | 89                                | 0.48                                           | 0.16                              |
| 2     | 10.16                             | 4                     | 516                                            | 411                               | 105                               | 0.48                                           | 0.16                              |
| 3     | 8.26                              | 4                     | 528                                            | 390                               | 138                               | 0.50                                           | 0.16                              |
| 4     | 6.95                              | 4                     | 517                                            | 395                               | 122                               | 0.52                                           | 0.16                              |
| 5     | 13.21                             | 0                     | 489                                            | 411                               | 78                                | 0.44                                           | 0.16                              |
| 6     | 13.21                             | 6                     | 497                                            | 407                               | 90                                | 0.45                                           | 0.16                              |
| 7     | 13.21                             | 10                    | 509                                            | 413                               | 96                                | 0.48                                           | 0.16                              |

[a] Determined by the multi-point BET method. [b] Analyzed by t-plot method. [c] Using the adsorption data at P/P<sub>0</sub> = 0.974.

**Table S3.** The textural properties of ZSM-5 obtained at different Initial gel compositions

| Entry | Initial gel composition           |                       | Surface Area (m <sup>2</sup> g <sup>-1</sup> ) |                                   |                                   | Pore Volume (cm <sup>3</sup> g <sup>-1</sup> ) |                                   |
|-------|-----------------------------------|-----------------------|------------------------------------------------|-----------------------------------|-----------------------------------|------------------------------------------------|-----------------------------------|
|       | H <sub>2</sub> O/SiO <sub>2</sub> | EtOH/SiO <sub>2</sub> | S <sub>BET</sub> <sup>[a]</sup>                | S <sub>micro</sub> <sup>[b]</sup> | S <sub>extra</sub> <sup>[b]</sup> | V <sub>total</sub> <sup>[c]</sup>              | V <sub>micro</sub> <sup>[b]</sup> |
| 1     | 13.21                             | 4                     | 554                                            | 464                               | 90                                | 0.46                                           | 0.18                              |
| 2     | 10.16                             | 4                     | 566                                            | 459                               | 107                               | 0.45                                           | 0.18                              |
| 3     | 8.26                              | 4                     | 589                                            | 454                               | 135                               | 0.52                                           | 0.18                              |
| 4     | 6.95                              | 4                     | 585                                            | 442                               | 143                               | 0.59                                           | 0.17                              |
| 5     | 13.21                             | 0                     | 557                                            | 457                               | 100                               | 0.45                                           | 0.18                              |
| 6     | 13.21                             | 6                     | 555                                            | 455                               | 100                               | 0.57                                           | 0.18                              |
| 7     | 13.21                             | 10                    | 540                                            | 433                               | 107                               | 0.52                                           | 0.17                              |

[a] Determined by the multi-point BET method. [b] Analyzed by t-plot method. [c] Using the adsorption data at P/P<sub>0</sub> = 0.974.
